# Supplementary material
Source: publisher figshare collection journal article supplement (https://acs.figshare.com/ndownloader/files/5077285)

## Expedient Synthesis of (±) Bipinnatin J

Paul A. Roethle and Dirk Trauner

Department of Chemistry, University of California, Berkeley, Berkeley, CA 94720-1460.

### Supporting Information

General Experimental Details: All reactions were carried out under an inert N<sub>2</sub> atmosphere in oven-dried glassware. Flash column chromatography was carried out with EcoChrom ICN SiliTech 32-63 D 60 Å silica gel. Reactions and chromatography fractions were monitored with Merck silica gel 60 F<sub>254</sub> plates and visualized with potassium permanganate and ceric ammonium molybdate. Tetrahydrofuran (THF) and methylene chloride (CH<sub>2</sub>Cl<sub>2</sub>) were dried by passage through activated alumina columns. Benzene (PhH) and diisopropylamine (*i*-Pr<sub>2</sub>NH) were distilled from CaH<sub>2</sub> prior to use. *n*-Butyllithium was titrated with diphenylacetic acid prior to use. All other reagents and solvents were used without further purification from commercial sources. Organic extracts were dried over MgSO<sub>4</sub> unless otherwise noted.

Instrumentation: FT-IR spectra were obtained on NaCl plates with an ATI Mattson Gemini spectrometer. Proton and carbon NMR spectra (<sup>1</sup>H NMR and <sup>13</sup>C NMR) were recorded in deuterated chloroform (CDCl<sub>3</sub>) on a Bruker DRX-500 spectrometer and calibrated to residual solvent peaks. Multiplicities are abbreviated as follows: s = singlet, d = doublet, t = triplet, q = quartet, br = broad, m = multiplet. Melting points were determined with an electrothermal apparatus and are uncorrected.

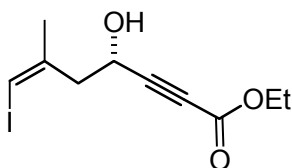

**(Z)-(S)-4-Hydroxy-7-iodo-6-methyl-hept-6-en-2-ynoic acid ethyl ester (11).** To a solution of (Z)-4-iodo-3-methyl-but-3-en-1-ol (**9**) (3.18 g, 15.0 mmol) in CH<sub>2</sub>Cl<sub>2</sub> (75 mL) was added NaHCO<sub>3</sub> (6.30 g, 75.0 mmol) followed by Dess-Martin periodinane (6.68 g, 15.8 mmol). After 15 min at rt, a 1:1:1 solution (75 mL) of saturated Na<sub>2</sub>S<sub>2</sub>O<sub>3</sub>, saturated NaHCO<sub>3</sub>, H<sub>2</sub>O was added. The resulting biphasic solution was stirred vigorously for 20 min. The layers were separated, and the aqueous was extracted 1 x CH<sub>2</sub>Cl<sub>2</sub> (50 mL). The organics were dried, filtered, and concentrated *in vacuo*. To the resulting oil was added 50 mL Et<sub>2</sub>O. The mixture was filtered and concentrated *in vacuo*. If additional solids precipitated, the mixture was filtered and concentrated again from Et<sub>2</sub>O. The crude aldehyde was taken up in THF (25 mL) and used without further purification. Meanwhile, to a solution of *i*-Pr<sub>2</sub>NH (6.31 mL, 45.0 mmol) in THF (45 mL) at -78 °C was added *n*-butyllithium (2.42 M in hexanes, 18.6 mL, 45.0 mmol) dropwise over 5 min. After 20 min at 0 °C, the solution was cooled to -78 °C and ethyl propiolate (4.57 mL,

45.0 mmol) in THF (30 mL) was added via cannula over 15 min. After 1 h, the aldehyde solution at  $-78\text{ }^{\circ}\text{C}$  was added via cannula to the acetylide solution at  $-78\text{ }^{\circ}\text{C}$ . After 30 min, a saturated solution of  $\text{NH}_4\text{Cl}$  (30 mL) was added. Then the reaction mixture was allowed to warm to rt. The layers were separated, and the aqueous was extracted 1 x  $\text{Et}_2\text{O}$  (100 mL). The organics were dried, filtered, and concentrated *in vacuo*. The crude oil was purified by flash column chromatography (16%  $\text{EtOAc}$ /hexanes) to give 3.07 g (66% for 2 steps) of **11** as a colorless oil.

$R_f$  0.57, 30%  $\text{EtOAc}$ /Hexanes.  $^1\text{H}$  NMR (500 MHz):  $\delta$  6.12 (d, 1 H,  $J = 1.5$  Hz), 4.72 (dt, 1 H,  $J = 8.5, 6$  Hz), 4.25 (q, 2 H,  $J = 7$  Hz), 2.80 (dd, 1 H,  $J = 13.5, 8.5$  Hz), 2.65 (dd, 1 H,  $J = 13.5, 6$  Hz), 2.03 (d, 1 H,  $J = 6$  Hz), 2.00 (d, 3 H,  $J = 1.5$  Hz), 1.32 (t, 3 H,  $J = 7$  Hz).  $^{13}\text{C}$  (125 MHz):  $\delta$  153.2, 142.4, 86.6, 78.5, 76.9, 62.2, 60.2, 45.4, 24.6, 14.0. IR: 3406, 2981, 1711, 1251. HRMS (EI) $^+$  calcd for  $\text{C}_{10}\text{H}_{13}\text{O}_3\text{I}$  (M) $^+$  307.9909, found 307.9907.

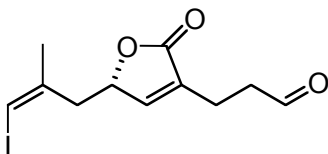

**3-[(S)-5-((Z)-3-Iodo-2-methyl-allyl)-2-oxo-2,5-dihydro-furan-3-yl]-propionaldehyde (**13**)**. To a solution of **11** (1.98 g, 6.43 mmol) in THF (21 mL) and acetone (10.5 mL) was added allyl alcohol (690  $\mu\text{L}$ , 9.65 mmol), camphorsulfonic acid (373 mg, 1.61 mmol), and  $\text{RuCp}(\text{MeCN})_3\text{PF}_6$  (139 mg, 0.321 mmol) sequentially. After 1.5 h at  $50\text{ }^{\circ}\text{C}$ , the reaction mixture was concentrated *in vacuo*. The crude oil was purified by flash column chromatography (40%  $\text{EtOAc}$ /hexanes) to 1.08 g (52%) of **13** as a light red oil in addition to 154 mg of the regioisomeric product.

$R_f$  0.32, 40%  $\text{EtOAc}$ /Hexanes.  $^1\text{H}$  NMR (500 MHz):  $\delta$  9.80 (t, 1 H,  $J = 1$  Hz), 7.15 (q, 1 H,  $J = 1.5$  Hz), 6.13 (d, 1 H,  $J = 1.5$  Hz), 5.06 (m, 1 H), 2.79 (m, 2 H), 2.65 (m, 3 H), 2.55 (dd, 1 H,  $J = 13.5, 7.5$  Hz), 1.99 (d, 3 H,  $J = 1.5$  Hz).  $^{13}\text{C}$  (125 MHz):  $\delta$  200.3, 172.9, 148.7, 142.2, 132.6, 79.5, 78.7, 42.3, 41.1, 24.8, 18.0. IR: 2908, 1752, 1725, 1062. HRMS (EI) $^+$  calcd for  $\text{C}_{11}\text{H}_{13}\text{O}_3\text{I}$  (M) $^+$  319.9909, found 319.9905.

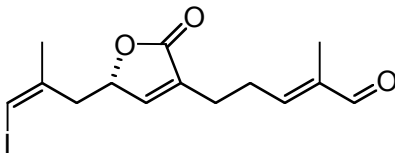

**(E)-5-[(S)-5-((Z)-3-Iodo-2-methyl-allyl)-2-oxo-2,5-dihydro-furan-3-yl]-2-methyl-pent-2-enal (**15**)**. To a solution of **13** (560 mg, 1.75 mmol) in PhH (8.7 mL) was added **14** (1.11 g, 3.50 mmol). After heating at reflux for 12 h, additional **14** (835 mg, 2.62

mmol) was added. After heating at reflux for 5 h, the dark solution was cooled to rt. A saturated solution of NH<sub>4</sub>Cl (10 mL) and Et<sub>2</sub>O (10 mL) were added. The layers were separated, and the aqueous was extracted 1 x Et<sub>2</sub>O (15 mL). The organics were dried, filtered, and concentrated *in vacuo*. The crude oil was purified by flash column chromatography (35-40% EtOAc/hexanes) to give 450 mg (71%) of **15** as a light red oil.

R<sub>f</sub> 0.54, 50% EtOAc/Hexanes. <sup>1</sup>H NMR (500 MHz): δ 9.41 (s, 1 H), 7.15 (d, 1 H, *J* = 1 Hz), 6.45 (t, 1 H, *J* = 7 Hz), 6.12 (d, 1 H, *J* = 1 Hz), 5.09 (m, 1 H), 2.66 (m, 3 H), 2.56 (m, 3 H), 1.98 (d, 3 H, *J* = 1 Hz), 1.76 (s, 3 H). <sup>13</sup>C (125 MHz): δ 194.9, 172.9, 151.7, 148.2, 142.2, 140.4, 133.1, 79.5, 78.8, 42.3, 26.6, 24.8, 24.2, 9.4. IR: 2945, 2917, 1754, 1682, 1061. HRMS (EI)<sup>+</sup> calcd for C<sub>14</sub>H<sub>17</sub>O<sub>3</sub>I (M)<sup>+</sup> 360.0222, found 360.0220.

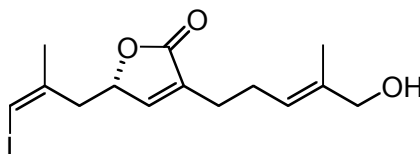

**(S)-3-((E)-5-Hydroxy-4-methyl-pent-3-enyl)-5-((Z)-3-iodo-2-methyl-allyl)-5H-furan-2-one (16).** To a solution of **15** (225 mg, 0.625 mmol) in MeOH (6.2 mL) was added sodium borohydride (26.0 mg, 0.687 mmol). After 20 min, a saturated NH<sub>4</sub>Cl solution (5 mL) was added carefully followed by Et<sub>2</sub>O (5 mL). The layers were separated, and the aqueous was extracted 1 x Et<sub>2</sub>O (10 mL). The organics were dried, filtered, and concentrated *in vacuo*. The crude oil was purified by flash column chromatography (50% EtOAc/hexanes) to give 224 mg (99%) of **16** as a colorless oil.

R<sub>f</sub> 0.30, 50% EtOAc/Hexanes. <sup>1</sup>H NMR (500 MHz): δ 7.10 (d, 1 H, *J* = 1.5 Hz), 6.11 (d, 1 H, *J* = 1.5 Hz), 5.40 (m, 1 H), 5.05 (ddd, 1 H, *J* = 7.5, 6.5, 1.5 Hz), 4.00 (s, 2 H), 2.66 (dd, 1 H, *J* = 13.5, 6.5 Hz), 2.54 (dd, 1 H, *J* = 13.5, 6.5 Hz), 2.35 (m, 4 H), 1.98 (d, 3 H, *J* = 1.5 Hz), 1.66 (s, 3 H), 1.54 (br s, 1 H). <sup>13</sup>C (125 MHz): δ 173.4, 147.7, 142.4, 136.3, 134.0, 123.9, 79.4, 78.5, 68.5, 42.4, 25.4, 25.1, 24.8, 13.8. IR: 3356, 2917, 2859, 1749, 1060. HRMS (EI)<sup>+</sup> calcd for C<sub>14</sub>H<sub>19</sub>O<sub>3</sub>I (M)<sup>+</sup> 362.0379, found 362.0386.

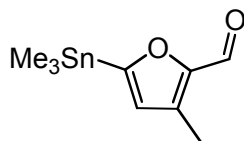

**3-Methyl-5-trimethylstannanyl-furan-2-carbaldehyde (19).** To a suspension of *N,O*-dimethylhydroxylamine hydrochloride (3.09 g, 31.1 mmol) in THF (155 mL) at -40 °C was added *n*-butyllithium (2.50 M in hexanes, 24.9 mL, 62.2 mmol) over 15 min while keeping the temperature below -40 °C. After 30 min, **17** (2.74 g, 24.9 mmol) in THF (22 mL) was added dropwise over 10 min. After 45 min, *n*-butyllithium (2.50 M in hexanes,

14.9 mL, 37.3 mmol) was added dropwise over 15 min, then stirred at  $-40\text{ }^{\circ}\text{C}$  for 1 h. A solution of  $\text{Me}_3\text{SnCl}$  (1.0 M in THF, 29.9 mL, 29.9 mmol) was added over 5 min. The solution was allowed to warm to  $-10\text{ }^{\circ}\text{C}$  over 30 min. A saturated solution of  $\text{NH}_4\text{Cl}$  (150 mL) was added. The layers were separated, and the aqueous was extracted 1 x  $\text{Et}_2\text{O}$  (100 mL). The organics were dried, filtered, and concentrated *in vacuo*. The crude oil was left under high vacuum for 12 h to remove residual  $\text{Me}_3\text{SnCl}$  and then used without further purification as a red/yellow oil, 5.77 g (85%) of **19**.

$R_f$  0.50, 10% EtOAc/Hexanes.  $^1\text{H}$  NMR (500 MHz):  $\delta$  9.75 (s, 1 H), 6.55 (s, 1 H), 2.35 (s, 3 H), 0.38 (s, 9 H).  $^{13}\text{C}$  (125 MHz):  $\delta$  177.3, 170.1, 153.0, 134.7, 126.3, 10.1,  $-9.2$ . IR: 2923, 1675, 1580, 768. HRMS (EI) $^+$  calcd for  $\text{C}_9\text{H}_{14}\text{O}_2\text{Sn}$  (M) $^+$  274.0016, found 274.0015.

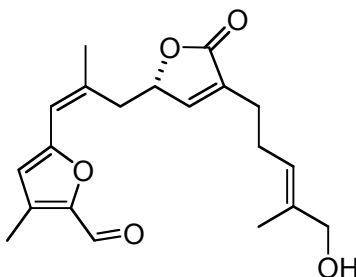

**5-[(Z)-3-[(S)-4-[(E)-5-Hydroxy-4-methyl-pent-3-enyl)-5-oxo-2,5-dihydro-furan-2-yl]-2-methyl-propenyl]-3-methyl-furan-2-carbaldehyde (20).** To a solution of **16** (718 mg, 1.98 mmol) in DMF (13 mL) was added **19** (703 mg, 2.58 mmol) followed by  $\text{Pd}(\text{PPh}_3)_4$  (91.6 mg, 0.0792 mmol),  $\text{CuI}$  (30.2 mg, 0.159 mmol), and  $\text{CsF}$  (602 mg, 3.96 mmol). After 20 min at rt, poured onto saturated  $\text{NH}_4\text{Cl}$  (20 mL) and  $\text{Et}_2\text{O}$  (20 mL). The layers were separated, and the aqueous washed extracted 1 x  $\text{Et}_2\text{O}$  (20 mL). The organics were then washed 1 x brine (25 mL). The organics were dried, filtered, and concentrated *in vacuo*. The crude oil was purified by flash column chromatography (65% EtOAc/hexanes) to give 627 mg (92%) of **20** as a yellow oil.

$R_f$  0.34, 60% EtOAc/Hexanes.  $^1\text{H}$  NMR (500 MHz):  $\delta$  9.61 (s, 1 H), 7.33 (br s, 1 H), 6.18 (s, 1 H), 6.17 (s, 1 H), 5.40 (m, 1 H), 5.12 (m, 1 H), 3.99 (s, 2 H), 3.23 (d, 1 H,  $J = 13\text{ Hz}$ ), 2.38 (m, 3 H), 2.36 (s, 3 H), 2.30 (m, 2 H), 2.05 (s, 3 H), 2.04 (s, 1 H), 1.65 (s, 1 H).  $^{13}\text{C}$  (125 MHz):  $\delta$  175.5, 173.9, 157.0, 149.1, 147.4, 141.9, 136.7, 136.5, 133.4, 123.7, 115.4, 114.0, 81.5, 68.4, 38.2, 26.7, 25.3, 24.8, 13.7, 10.0. IR: 3443, 2923, 2854, 1751, 1658, 1499, 1064. HRMS (EI) $^+$  calcd for  $\text{C}_{20}\text{H}_{24}\text{O}_5$  (M) $^+$  344.1624, found 344.1630.

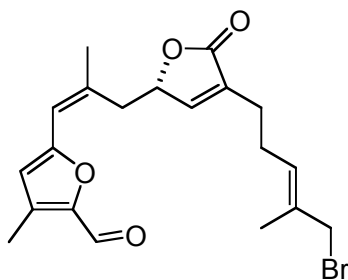

**5-[(Z)-3-[(S)-4-[(E)-5-Bromo-4-methyl-pent-3-enyl]-5-oxo-2,5-dihydro-furan-2-yl]-2-methyl-propenyl]-3-methyl-furan-2-carbaldehyde (**21**)**. To a solution of **20** (228 mg, 0.662 mmol) in CH<sub>2</sub>Cl<sub>2</sub> (13 mL) at -5 °C was added PPh<sub>3</sub> (191 mg, 0.728 mmol) and *N*-bromosuccinimide (130 mg, 0.728 mmol). After 20 min, the solution was poured onto H<sub>2</sub>O. The layers were separated, and the aqueous was extracted 1 x CH<sub>2</sub>Cl<sub>2</sub>. The organics were dried, filtered, and concentrated *in vacuo*. The crude oil was purified by flash column chromatography (35% EtOAc/hexanes) to give 233 mg (87%) of **21** as a light yellow oil.

R<sub>f</sub> 0.49, 40% EtOAc/Hexanes. <sup>1</sup>H NMR (500 MHz): δ 9.64 (s, 1 H), 7.25 (br s, 1 H), 6.18 (s, 1 H), 6.17 (s, 1 H), 5.54 (t, 1 H, *J* = 7 Hz), 5.12 (m, 1 H), 3.93 (s, 2 H), 3.17 (d, 1 H, *J* = 13 Hz), 2.55 (m, 1 H), 2.36 (m, 2 H), 2.34 (s, 3 H), 2.29 (m, 2 H), 2.04 (s, 3 H), 1.73 (s, 3 H). <sup>13</sup>C (125 MHz): δ 175.6, 173.5, 156.7, 149.0, 147.5, 141.2, 135.9, 133.5, 133.1, 129.3, 115.6, 114.0, 81.2, 41.2, 38.2, 26.7, 26.0, 24.6, 14.7, 10.1. IR: 2924, 2848, 1754, 1663, 1499. HRMS (EI)<sup>+</sup> calcd for C<sub>20</sub>H<sub>23</sub>O<sub>4</sub> (M-Br)<sup>+</sup> 327.1596, found 327.1594.

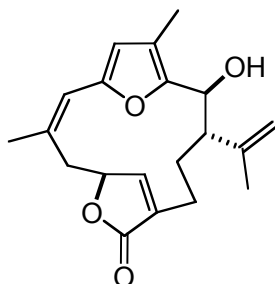

**Bipinnatin J (**4**)**. To a suspension of CrCl<sub>2</sub> (438 mg, 3.56 mmol), NiCl<sub>2</sub>·DME (196 mg, 0.891 mmol), and 4 Å molecular sieves (1.49 g) in THF (55 mL) was added **19** (121 mg, 0.297 mmol) in THF (5 mL) via syringe pump over 1.5 h. After 12 h at rt, H<sub>2</sub>O (20 mL) was added. The biphasic solution was filtered and concentrated to about 30 mL. The layers were separated, and the aqueous was extracted 1 x Et<sub>2</sub>O (25 mL). The organics were dried, filtered, and concentrated *in vacuo*. The crude oil was purified by flash column chromatography (30% EtOAc/hexanes) to give 57.9 mg (59%) as a white powder.

R<sub>f</sub> 0.33, 30% EtOAc/Hexanes. HRMS (EI)<sup>+</sup> calcd for C<sub>20</sub>H<sub>24</sub>O<sub>5</sub> (M)<sup>+</sup> 328.1675, found 328.1674. mp 140-142 °C.

| <sup>1</sup> H NMR isolation                   | <sup>1</sup> H NMR current        | <sup>13</sup> C NMR isolation | <sup>13</sup> C NMR current |
|------------------------------------------------|-----------------------------------|-------------------------------|-----------------------------|
| 6.83 (br s, 1H)                                | 6.84 (br s, 1H)                   | 174.2                         | 174.3                       |
| 6.09 (br s, 1H)                                | 6.10 (br s, 1H)                   | 152.2                         | 152.3                       |
| 6.02 (s, 1H)                                   | 6.02 (s, 1H)                      | 151.0                         | 151.0                       |
| 5.14 (br s, 1H)                                | 5.15 (br s, 1H)                   | 149.3                         | 149.2                       |
| 5.03 (br s, 1H)                                | 5.05 (s, 1H)                      | 142.2                         | 142.1                       |
| 4.96 (m, 1H)                                   | 4.98 (m, 1H)                      | 132.6                         | 132.5                       |
| 4.49 (br d, 1H, $J = 10.8$ Hz)                 | 4.50 (br d, 1H, $J = 11$ Hz)      | 128.9                         | 129.0                       |
| 3.18 (dd, 1H, $J = 12.0, 11.7$ Hz)             | 3.19 (t, 1H, $J = 12$ Hz)         | 121.0                         | 121.1                       |
| 2.71 (dd, 1H, $J = 12.0, 4.5$ Hz)              | 2.72 (dd, 1H, $J = 12, 4.5$ Hz)   | 118.4                         | 118.7                       |
| 2.38 (ddd, 1H, $J = 14.2, 14.2, 3.0$ Hz)       | 2.40 (dd, 1H, $J = 14.5, 3.0$ Hz) | 117.3                         | 117.3                       |
| 2.35 (dd, 1H, $J = 10.8, 10.8$ Hz)             | 2.36 (t, 1 H, $J = 11$ Hz)        | 113.8                         | 113.8                       |
| 2.07 (m, 1H)                                   | 2.07 (m, 1H)                      | 78.6                          | 78.6                        |
| 2.03 (s, 3H)                                   | 2.04 (s, 3H)                      | 65.0                          | 64.9                        |
| 1.98 (br s, 3H)                                | 1.99 (br s, 3H)                   | 51.1                          | 51.1                        |
| 1.92 (br s (OH), 1H)                           | 1.89 (br s (OH), 1H)              | 39.7                          | 39.7                        |
| 1.78 (br s, 3H)                                | 1.79 (br s, 3H)                   | 30.1                          | 30.0                        |
| 1.65 (dddd, 1H, $J = 13.8, 10.8, 3.3, 3.3$ Hz) | 1.66 (m, 1H)                      | 25.7                          | 25.8                        |
| 0.88 (ddd, 1H, $J = 13.8, 13.8, 3.3$ Hz)       | 0.89 (td, 1H, $J = 13.5, 3.5$ Hz) | 19.6                          | 19.6                        |
|                                                |                                   | 17.6                          | 17.5                        |
|                                                |                                   | 9.4                           | 9.5                         |

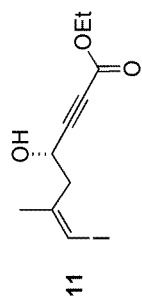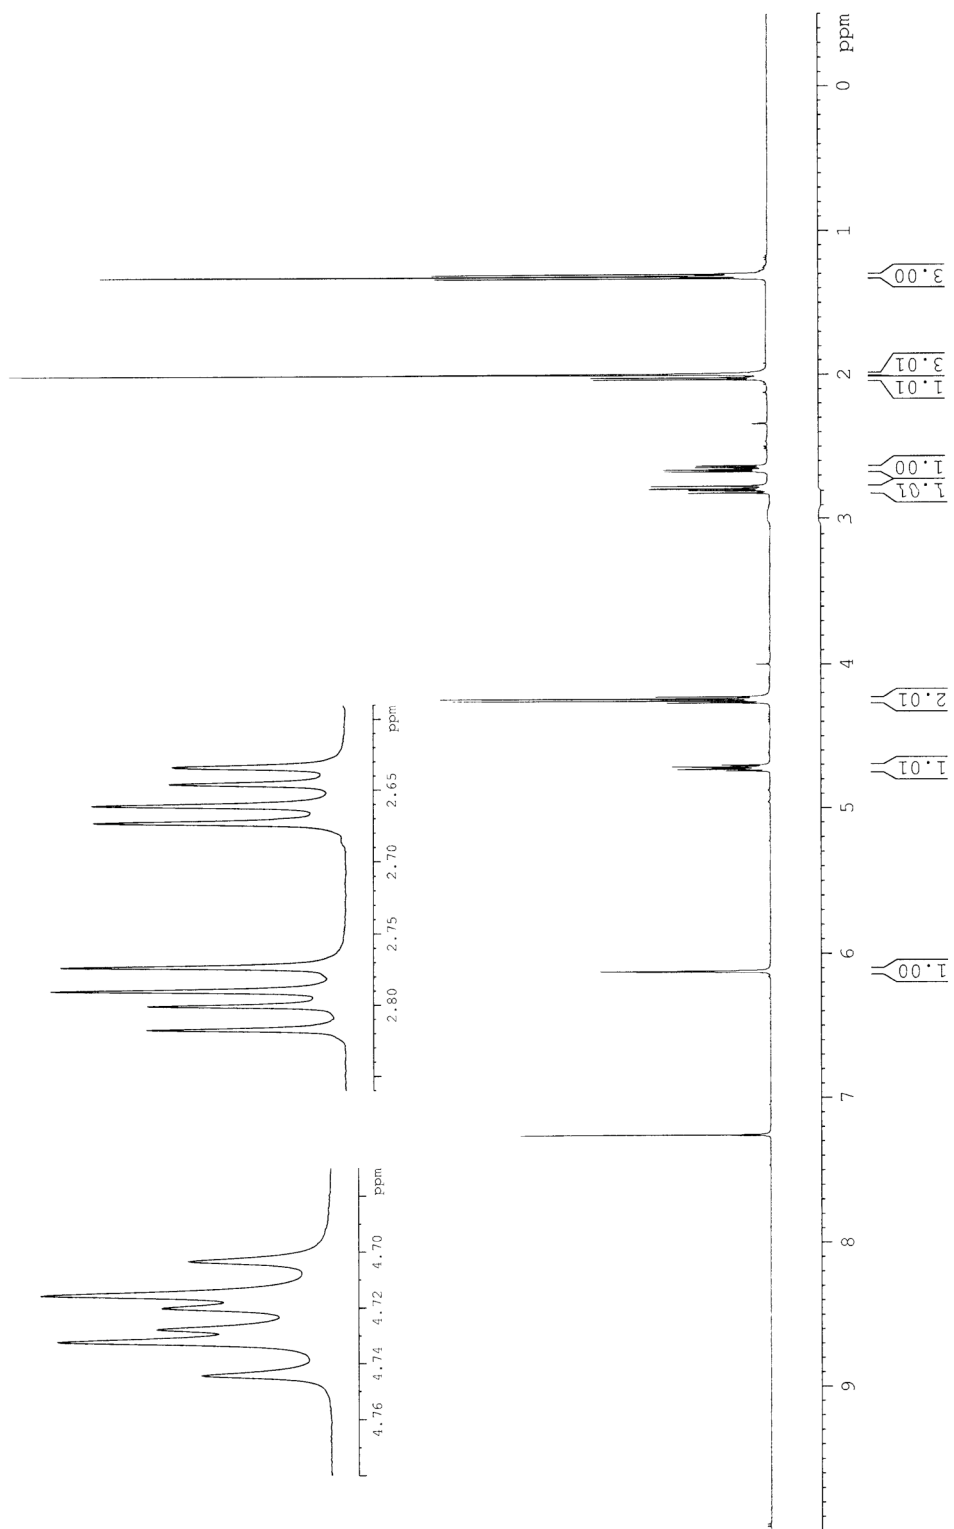

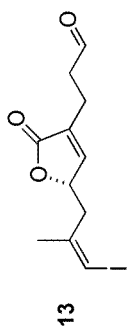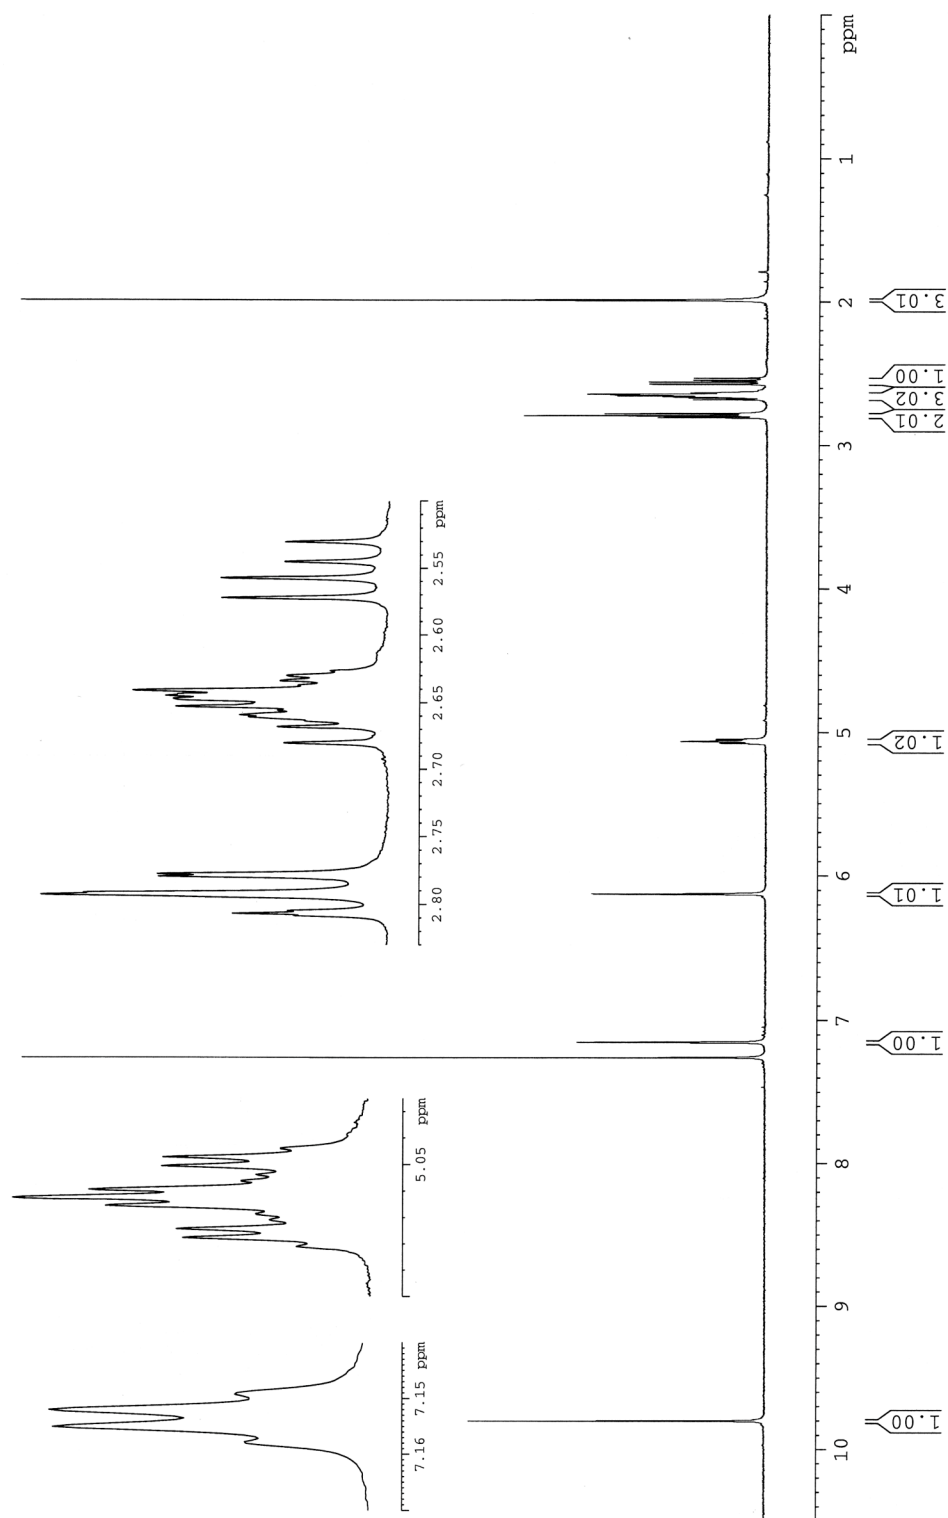



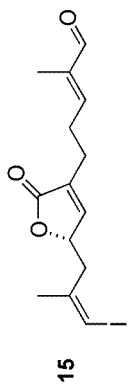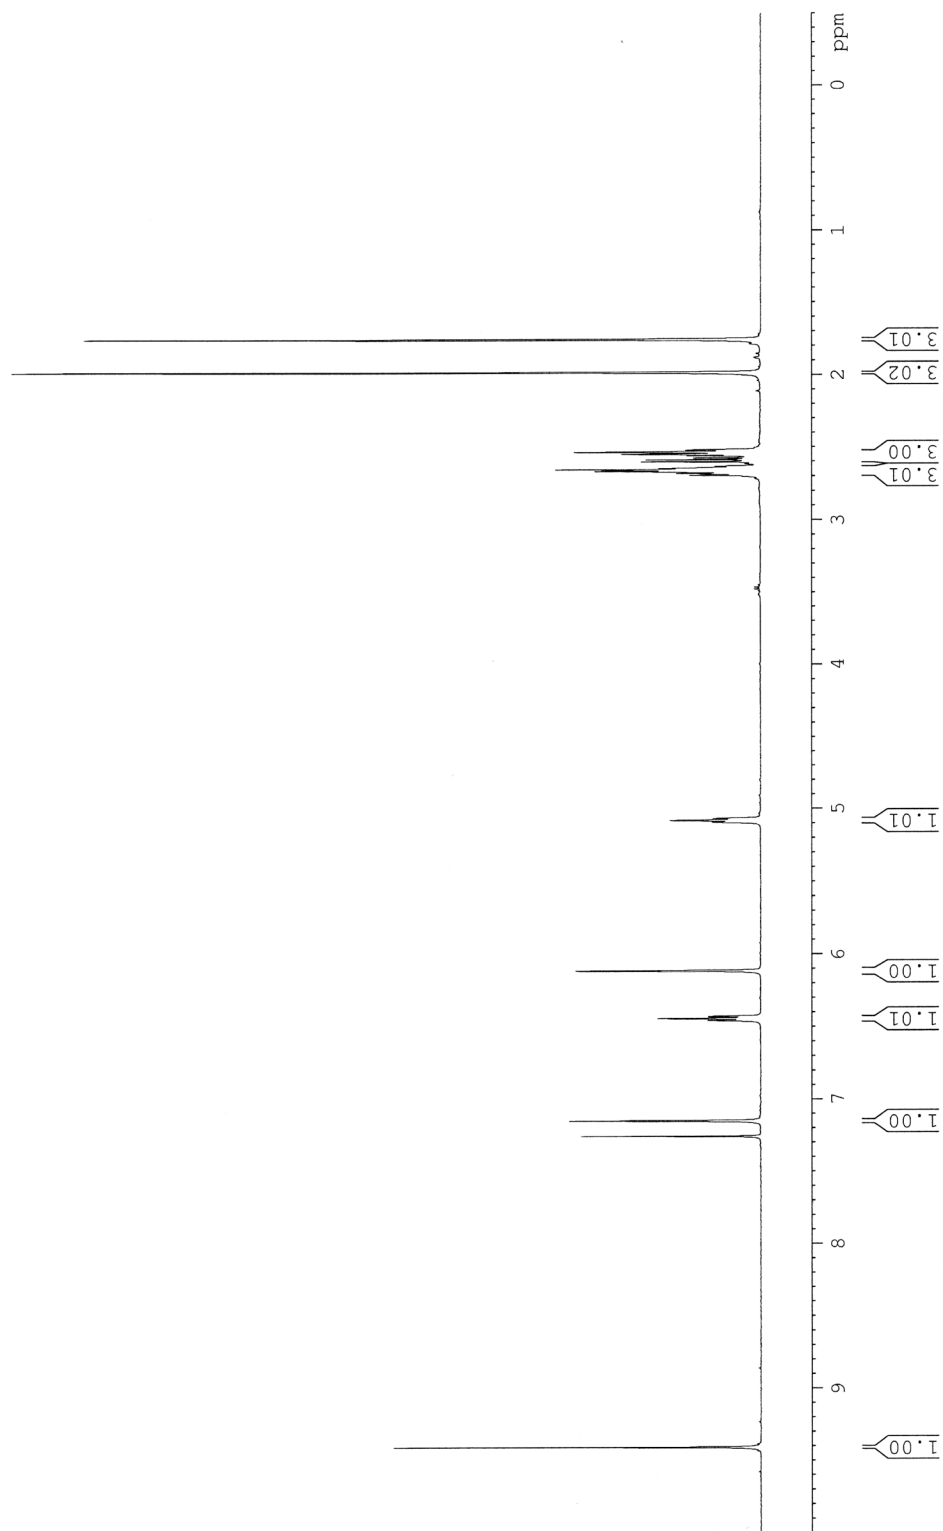

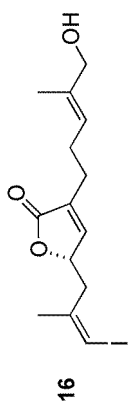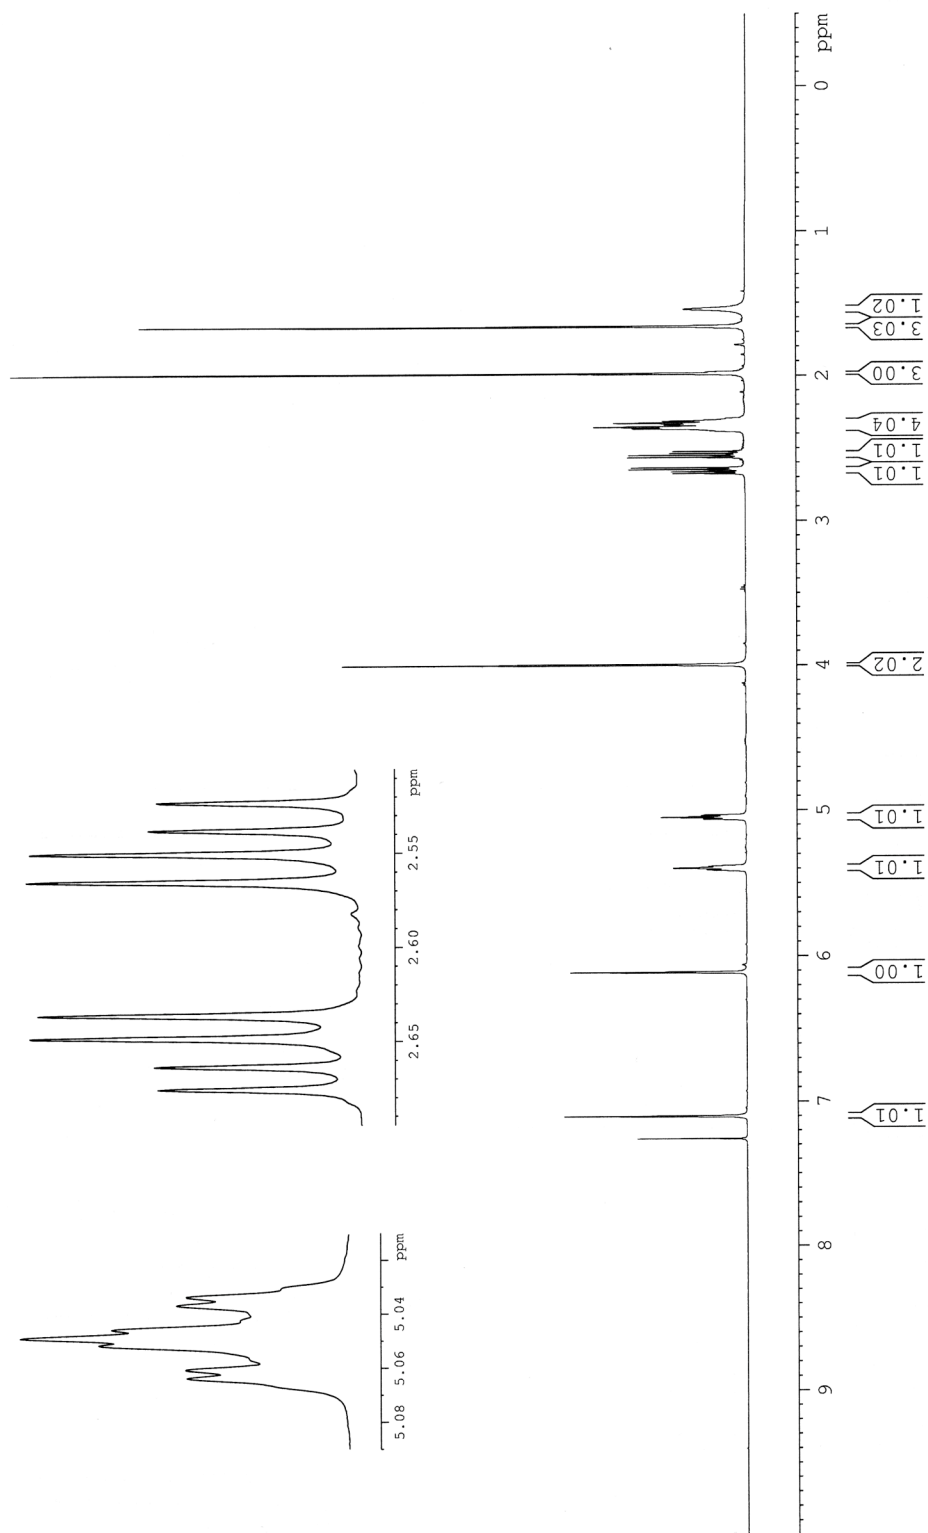

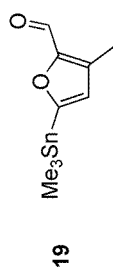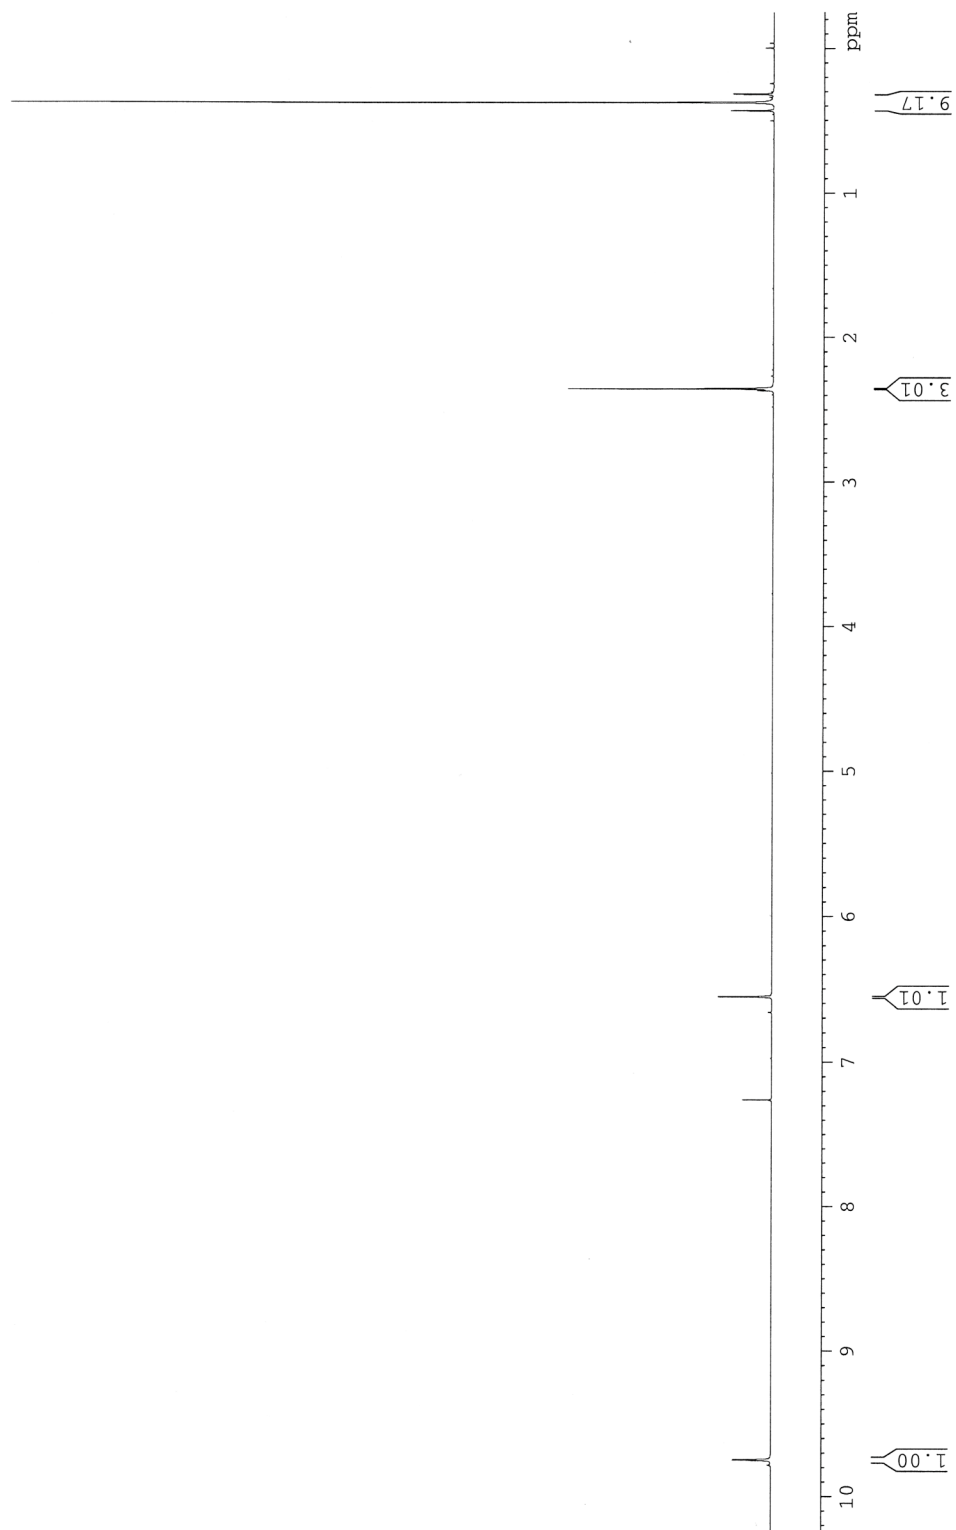

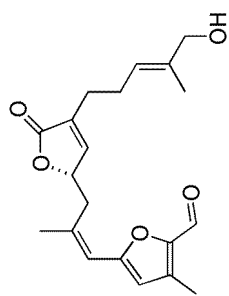

20

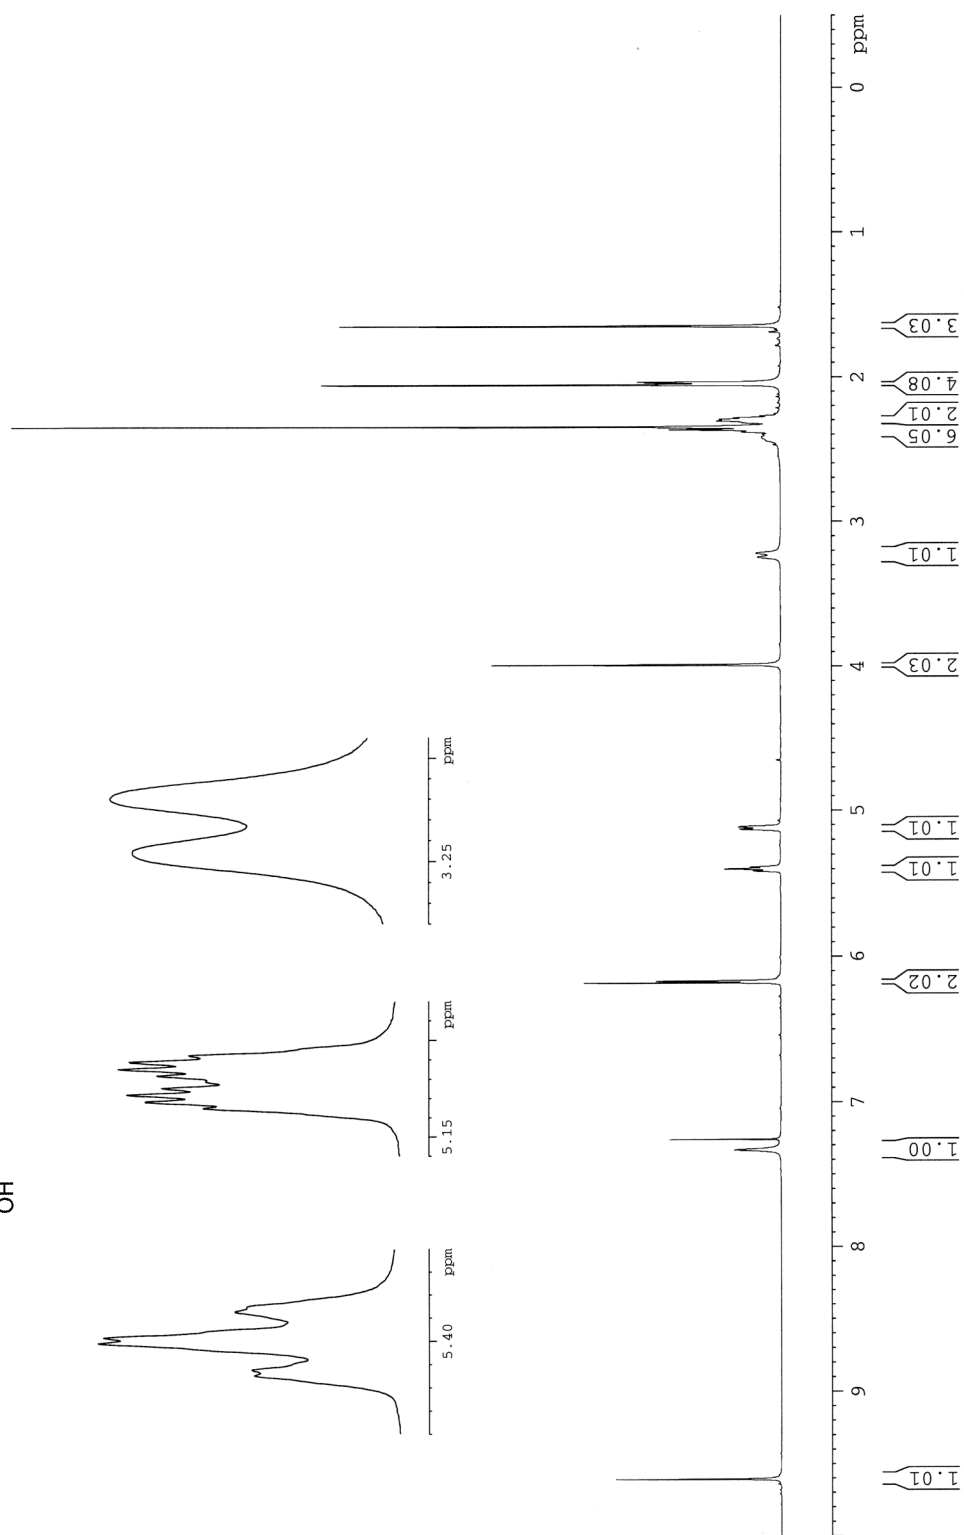

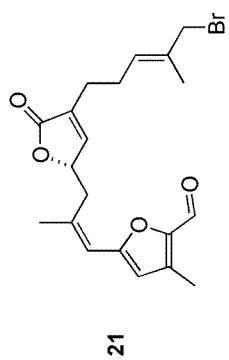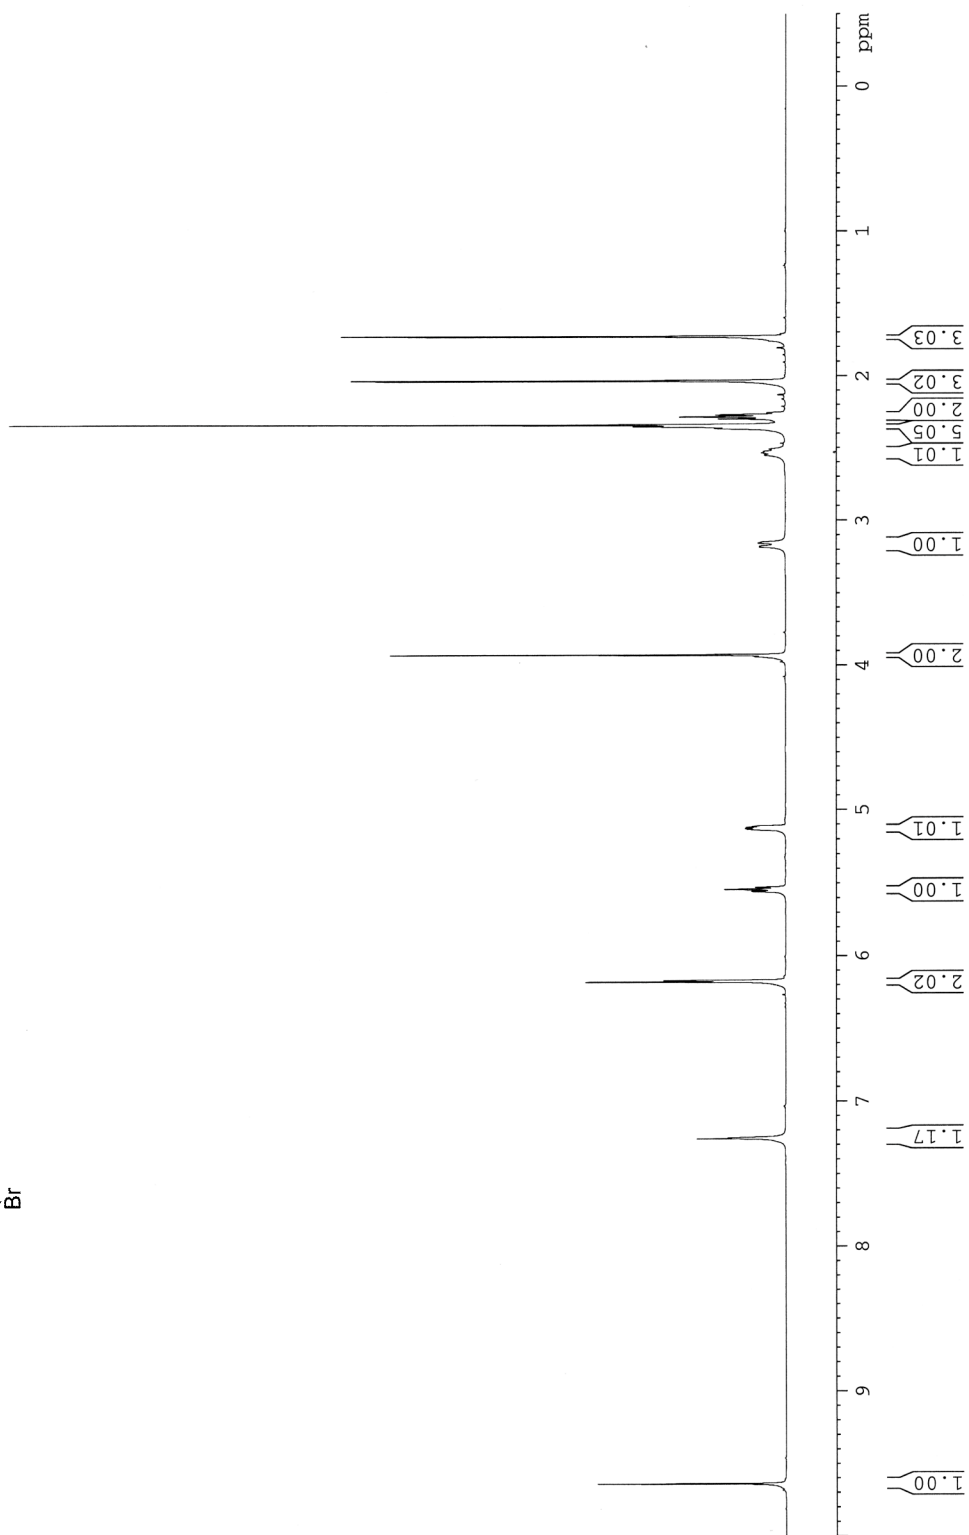

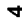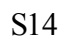

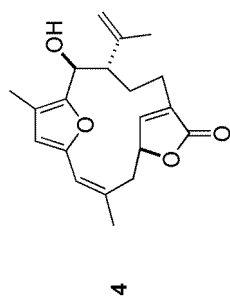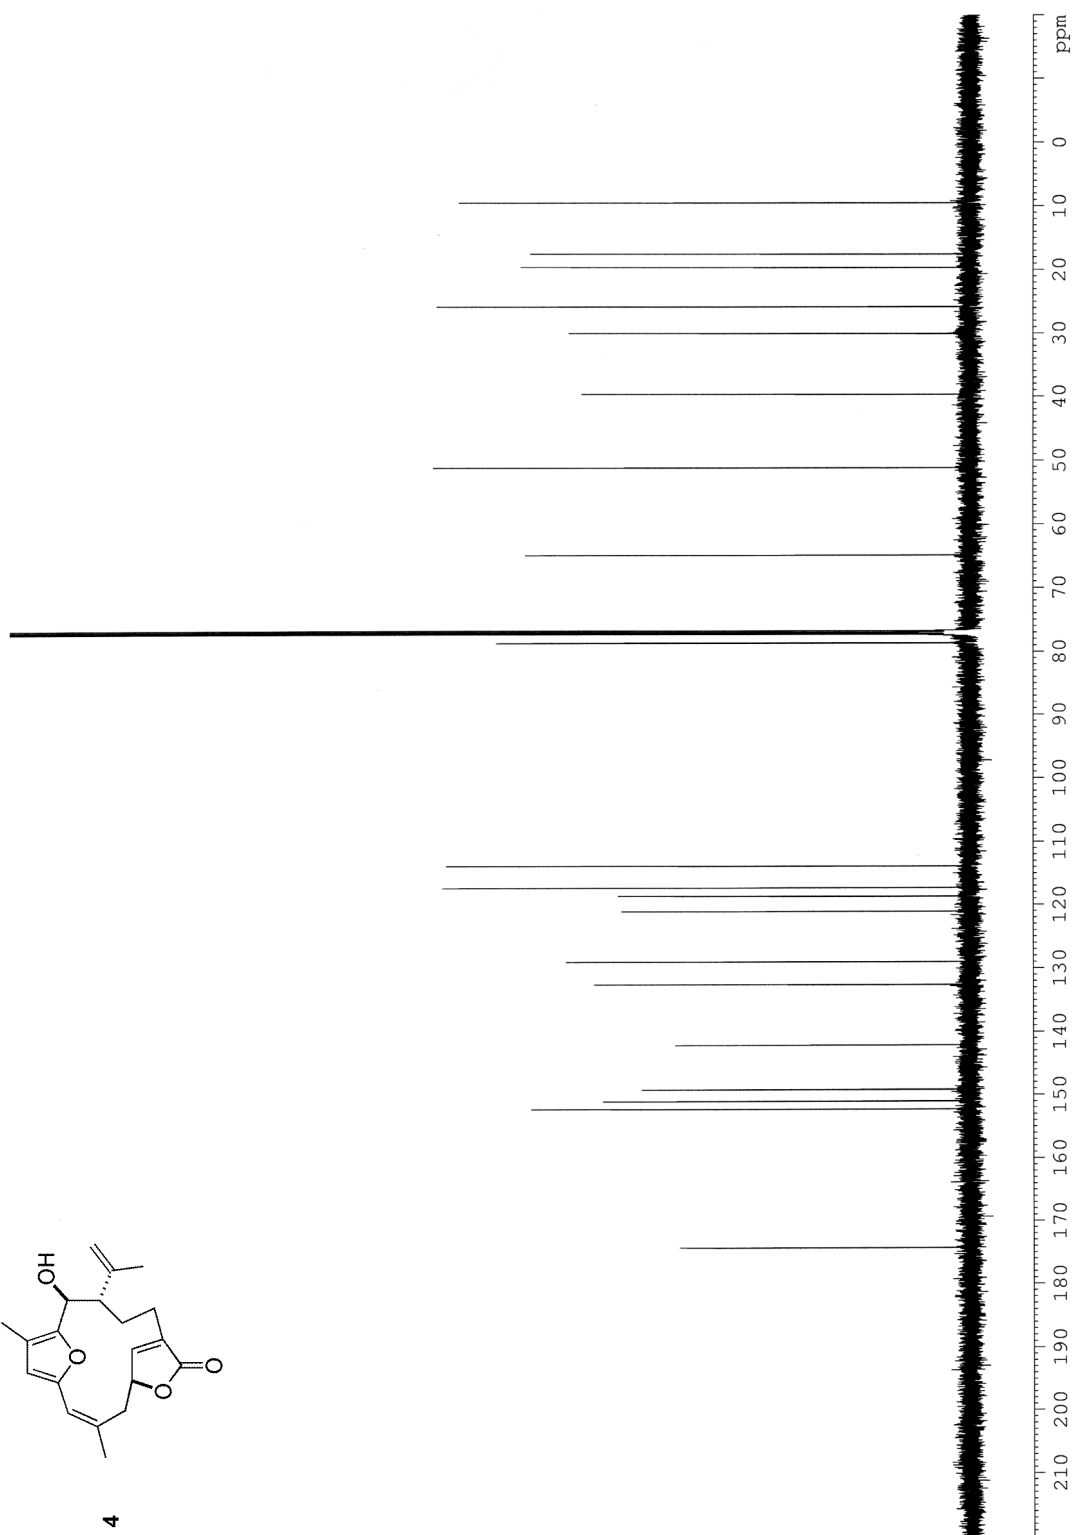

Supplement: Supplementary file 1 [file 5077285]
